# Supplementary material
Source: publisher site journal article supplement (https://www.spandidos-publications.com/5323/downloadSupplementary)

Figure S1. Effect of hnRNPAB knockdown on apoptosis of non-small cell lung cancer. Apoptosis was detected using flow cytometry. Results are representative of three independent experiments. HnRNPAB, heterogeneous nuclear ribonucleoprotein A/B; NC, negative control; shRNA, short hairpin RNA.

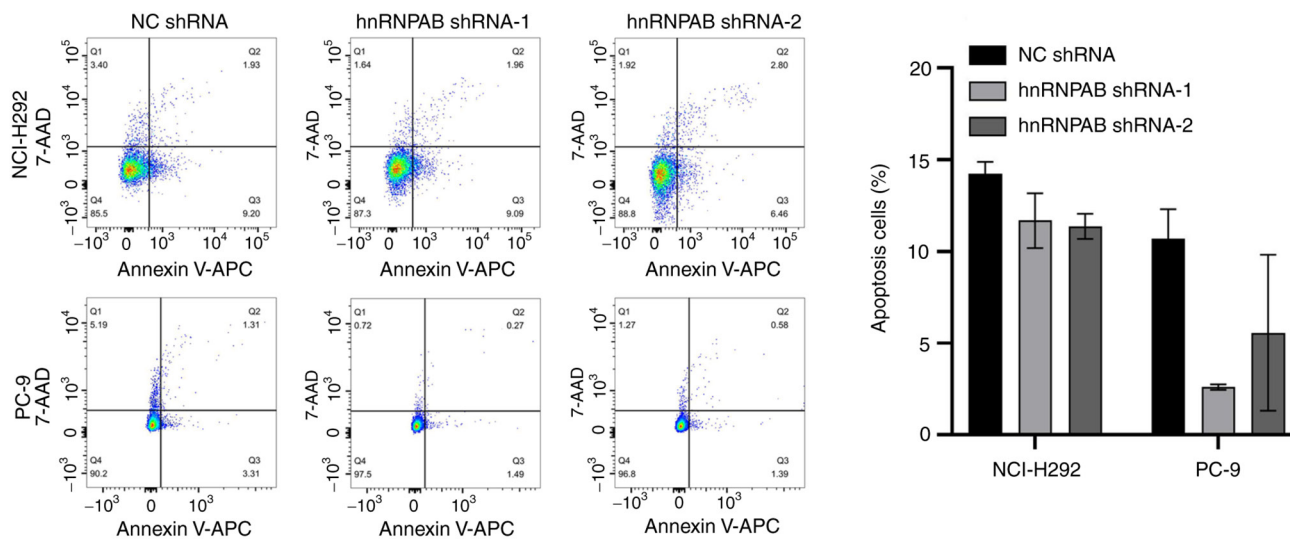

Figure S2. Expression levels of the screened genes in stable hnRNPAB-silenced cells are verified using RT-qPCR. The total RNA was extracted and the mRNA expression levels of HSPA9, SFXN1, PPM1G, TMED9, and DDX41 in stable non-small cell lung cancer cells were determined using RT-qPCR. GAPDH was used as an internal control. Results are representative of three independent experiments. RT-qPCR, reverse transcription-quantitative PCR; HSP, heat shock protein family; SFXN1, sideroflexin 1; PPM1G, protein phosphatase, Mg<sup>2+</sup>/Mn<sup>2+</sup> dependent 1G; TMED9, transmembrane p24 trafficking protein 9; DDX41, DEAD-box helicase 41; NC, negative control; shRNA, short hairpin RNA.

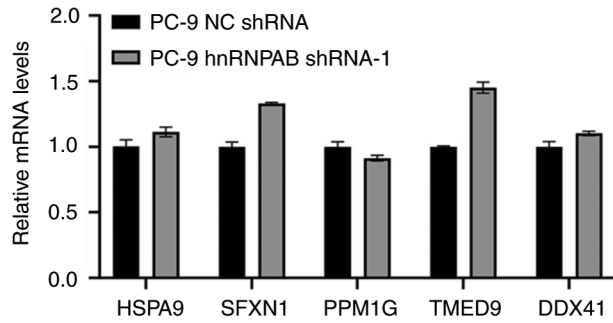

Supplement: Supplementary file 1 [file downloadSupplementary]
